# Supplementary material for: Dose-dependent skeletal deficits due to varied reductions in mechanical loading in rats
Source: PubMed Central journal article supplement (PMC7235020; doi:10.1038/s41526-020-0105-0), 2020-05-18
Supplement: 41526_2020_105_MOESM1_ESM.pdf [file 41526_2020_105_MOESM1_ESM.pdf]

1 **Supplementary Table 1. MicroCT and dynamic histomorphometry outcome of cortical bone parameters (mean ± SD)**

|                                                          | 1-week      |             |             |             | 2-week      |             |             |             | 4-week      |             |             |             | <i>P</i> value |          |             |
|----------------------------------------------------------|-------------|-------------|-------------|-------------|-------------|-------------|-------------|-------------|-------------|-------------|-------------|-------------|----------------|----------|-------------|
|                                                          | PWB100      | PWB70       | PWB40       | PWB20       | PWB100      | PWB70       | PWB40       | PWB20       | PWB100      | PWB70       | PWB40       | PWB20       | PWB            | Duration | Interaction |
| <b>Ct.TMD</b><br>[mg HA/cm <sup>3</sup> ]                | 1095 ± 6    | 1102 ± 6    | 1102 ± 6    | 1097 ± 4    | 1101 ± 5    | 1113 ± 4    | 1109 ± 5    | 1095 ± 5    | 1112 ± 4    | 1106 ± 4    | 1109 ± 6    | 1102 ± 6    | 0.08           | 0.14     | 0.62        |
| <b>Ct.Th</b> [μm]                                        | 620 ± 14    | 623 ± 17    | 624 ± 14    | 615 ± 9     | 629 ± 12    | 643 ± 14    | 633 ± 11    | 616 ± 10    | 648 ± 14    | 636 ± 10    | 649 ± 13    | 630 ± 13    | 0.48           | 0.08     | 0.95        |
| <b>Ct.Ar</b> [mm <sup>2</sup> ]                          | 6.60 ± 0.18 | 6.46 ± 0.15 | 6.39 ± 0.12 | 6.34 ± 0.08 | 6.56 ± 0.13 | 6.39 ± 0.14 | 6.35 ± 0.14 | 6.29 ± 0.15 | 7.00 ± 0.14 | 7.05 ± 0.19 | 6.84 ± 0.17 | 6.88 ± 0.22 | 0.29           | <0.0001  | 0.99        |
| <b>Tt.Ar</b> [mm <sup>2</sup> ]                          | 11.6 ± 0.49 | 11.2 ± 0.29 | 10.9 ± 0.35 | 10.9 ± 0.28 | 11.7 ± 0.49 | 10.7 ± 0.35 | 10.9 ± 0.31 | 10.8 ± 0.36 | 12.4 ± 0.57 | 12.7 ± 0.55 | 11.9 ± 0.46 | 12.3 ± 0.53 | 0.23           | <0.0001  | 0.78        |
| <b>Ct.Ar/Tt.Ar</b> [%]                                   | 57.2 ± 1.4  | 58.1 ± 1.4  | 59.2 ± 1.4  | 58.2 ± 1.2  | 56.6 ± 1.5  | 60.2 ± 1.3  | 58.6 ± 0.9  | 58.5 ± 1.0  | 57.5 ± 1.6  | 56.2 ± 1.5  | 58.1 ± 1.1  | 56.1 ± 1.4  | 0.52           | 0.25     | 0.64        |
| <b>I<sub>max</sub></b> [mm <sup>4</sup> ]                | 11.5 ± 0.9  | 10.2 ± 0.4  | 10.0 ± 0.5  | 10.2 ± 0.4  | 11.4 ± 0.9  | 9.5 ± 0.5   | 9.6 ± 0.5   | 9.8 ± 0.6   | 13.1 ± 1.0  | 13.0 ± 0.9  | 11.8 ± 0.9  | 12.8 ± 0.9  | 0.30           | <0.0001  | 0.66        |
| <b>I<sub>min</sub></b> [mm <sup>4</sup> ]                | 6.37 ± 0.47 | 6.14 ± 0.31 | 5.74 ± 0.31 | 5.70 ± 0.26 | 6.54 ± 0.40 | 5.79 ± 0.34 | 5.99 ± 0.34 | 5.64 ± 0.34 | 7.17 ± 0.57 | 7.96 ± 0.59 | 6.92 ± 0.45 | 7.15 ± 0.60 | 0.06           | <0.0001  | 0.91        |
| <b>En.MAR</b> [μm]                                       | 2.11 ± 0.19 | 2.19 ± 0.36 | 1.91 ± 0.18 | 2.51 ± 0.32 | 2.95 ± 0.27 | 2.89 ± 0.37 | 3.12 ± 0.58 | 2.91 ± 0.63 | 2.39 ± 0.18 | 2.06 ± 0.14 | 2.91 ± 0.63 | 3.09 ± 0.61 | 0.54           | 0.03     | 0.77        |
| <b>En.MS/BS</b> [%]                                      | 30.3 ± 4.9  | 30.2 ± 8.4  | 40.0 ± 7.6  | 36.1 ± 2.6  | 34.6 ± 5.3  | 33.4 ± 5.0  | 28.6 ± 5.2  | 42.3 ± 10   | 36.2 ± 7.3  | 22.5 ± 4.9  | 44.5 ± 15   | 41.3 ± 5.2  | 0.29           | 0.93     | 0.65        |
| <b>En.BFR/BS</b> [μm <sup>3</sup> /μm <sup>2</sup> /day] | 0.63 ± 0.12 | 0.77 ± 0.30 | 0.82 ± 0.19 | 0.93 ± 0.16 | 1.02 ± 0.18 | 1.02 ± 0.26 | 0.97 ± 0.29 | 1.41 ± 0.63 | 0.90 ± 0.24 | 0.48 ± 0.13 | 1.57 ± 0.74 | 1.31 ± 0.38 | 0.32           | 0.36     | 0.70        |
| <b>Ps.MAR</b> [μm]                                       | 1.49 ± 0.07 | 1.68 ± 0.13 | 1.89 ± 0.09 | 1.78 ± 0.15 | 2.43 ± 0.37 | 2.04 ± 0.17 | 2.49 ± 0.71 | 1.97 ± 0.12 | 1.63 ± 0.41 | 1.45 ± 0.26 | 2.07 ± 0.22 | *           | 0.89           | 0.03     | 0.85        |
| <b>Ps.MS/BS</b> [%]                                      | 21.8 ± 5.9  | 22.6 ± 4.7  | 22.4 ± 7.8  | 25.4 ± 3.4  | 35.1 ± 8.0  | 25.2 ± 6.9  | 19.8 ± 2.6  | 20.1 ± 9.0  | 25.2 ± 7.7  | 13.2 ± 1.7  | 8.48 ± 2.8  | *           | 0.27           | 0.20     | 0.63        |
| <b>Ps.BFR/BS</b> [μm <sup>3</sup> /μm <sup>2</sup> /day] | 0.40 ± 0.09 | 0.38 ± 0.10 | 0.53 ± 0.15 | 0.46 ± 0.10 | 0.94 ± 0.33 | 0.52 ± 0.17 | 0.54 ± 0.16 | 0.40 ± 0.18 | 0.50 ± 0.24 | 0.21 ± 0.07 | 0.23 ± 0.03 | *           | 0.27           | 0.09     | 0.53        |

2
